# Supplementary material for: In vitrodynamic gastric digestion of soya protein/milk protein blended beverages: influence of protein composition and co-processing
Source: Royal Society of Chemistry journal article supplement (doi:10.1039/d0fo02742a), 2021-01-01
Supplement: d0fo02742a1.pdf [file d0fo02742a1.pdf]

### Supplementary information

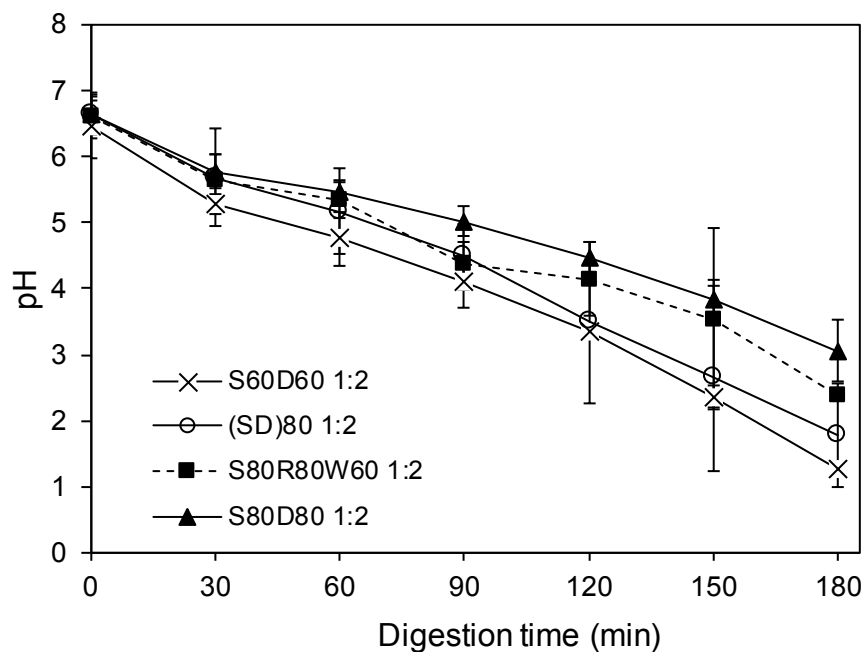

**Fig. S1** Changes in digesta pH during in vitro dynamic gastric digestion in the HGS for soya protein/milk protein blended beverages (soya protein to milk protein ratio of 1:2) prepared by different co-processing methods: S60D60, unheated treatment; (SD)80, co-heated treatment; S80D80, heated 1; S80R80W60, heated 2 (see Section 2.2).

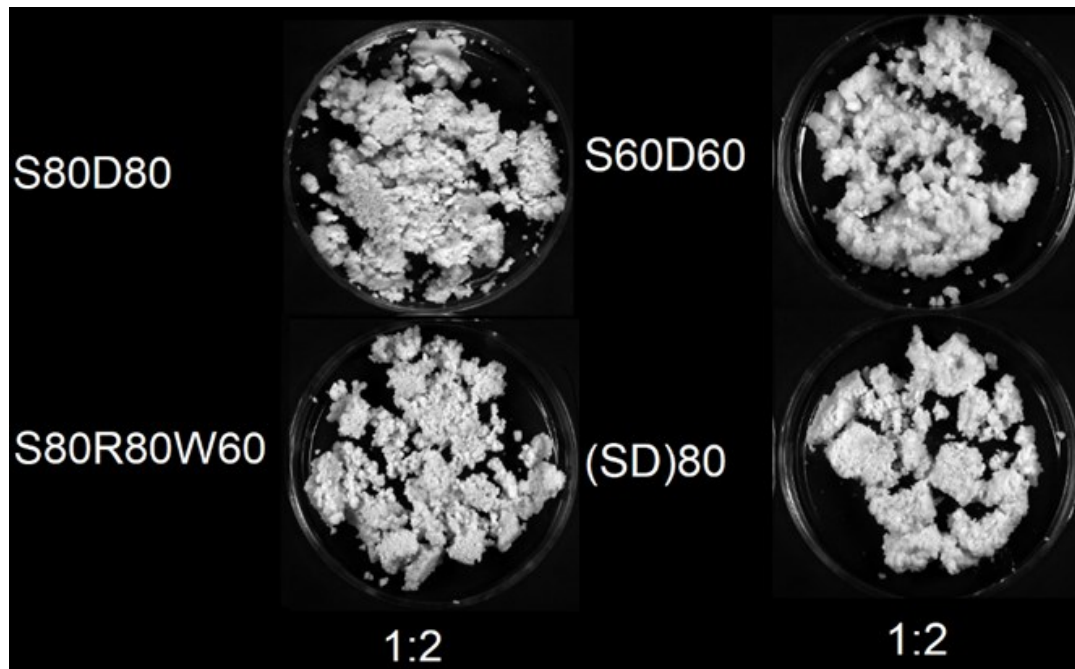

**Fig. S2** Appearance of clot remaining after 180 min of in vitro dynamic gastric digestion in the HGS for soya protein/milk protein blended beverages (soya protein to milk protein ratio of 1:2) prepared by different co-processing methods: S60D60, unheated treatment; (SD)80, co-heated treatment; S80D80, heated 1; S80R80W60, heated 2 (see Section 2.2).

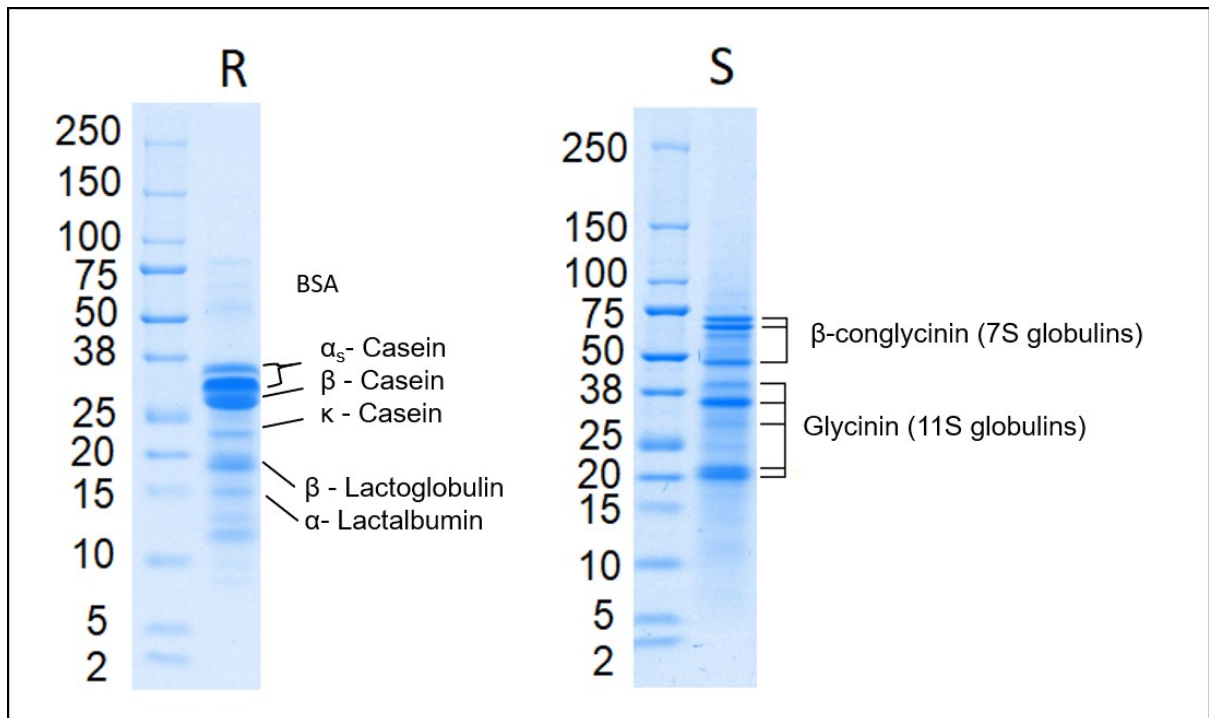

**Fig. S3** Reducing SDS-PAGE of skim milk retentate (R) and soya protein isolate (S) used in the preparation of soya protein/milk protein blended beverages.
